# Supplementary material for: Hibiscetin attenuates lipopolysaccharide-evoked memory impairment by inhibiting BDNF/caspase-3/NF-κB pathway in rodents
Source: PeerJ. 2024 Jan 31;12:e16795. doi: 10.7717/peerj.16795 (PMC10838095; doi:10.7717/peerj.16795)
Supplement: Supplemental Information 2 [file peerj-12-16795-s002.xlsx]

## Sheet: Raw Data
Parameters	Control	LPS Control	LPS+ Hibiscetin-10	Hibiscetin per se
Y-Maze	81.1	46.45	70.87	80.16
	46.9	23.55	43.13	45.84
	67.35	49.34	64.69	73.61
	60.65	20.66	49.31	52.39
	74.34	42.67	67.77	70.34
	53.66	27.33	46.23	55.66
Total arms entries	13.36	7.26	12.56	13.78
	12.64	4.74	9.44	12.22
	14.05	6.79	12.36	14.78
	11.95	5.21	9.64	11.22
	14.76	7.46	12.21	14.96
	11.24	4.54	9.79	11.04
MWM-Time spent	53.1	27.26	40.56	57.16
	40.9	14.74	27.44	34.84
	50.35	25.79	36.76	49.61
	43.65	16.21	31.24	42.39
	56.34	23.22	38.21	53.34
	37.66	18.78	29.79	38.66
MWM Days
1	81.05	83.59	75.22	78.3
2	61.81	73.28	51.31	59.06
3	44.08	66.21	43.03	41.33
4	27.05	46.48	27.89	24.3
5	16.1	39.97	18.15	13.35
ChAT	118.1	73.45	94.87	123.16
	103.9	50.55	71.13	96.84
	122.35	76.34	100.69	127.61
	99.65	47.66	75.31	92.39
	130.34	67.67	106.77	117.34
	91.66	56.33	69.23	102.66
AChE	71.1	115.65	97.07	73.16
	50.9	86.75	73.33	46.84
	68.35	119.54	70.89	70.61
	53.65	82.86	77.51	49.39
	73.34	111.87	85.97	77.34
	48.66	90.53	59.43	42.66
MDA	1.85	4.65	3.45	1.75
	2.75	5.55	4.35	2.65
	1.74	4.54	3.34	1.64
	2.86	5.66	4.46	2.76
	3.09	5.89	4.69	2.99
	1.51	4.31	3.11	1.41
SOD	38.56	23.45	32.14	38.16
	31.04	12.09	26.06	29.84
	39.81	25.89	33.13	37.18
	31.77	10.74	25.74	30.82
	41.22	21.21	35.27	41.72
	27.62	15.64	21.67	26.28
GSH	68.1	46.45	65.87	73.16
	53.9	23.55	42.13	46.84
	64.35	49.34	61.69	70.61
	57.65	20.66	46.31	49.39
	70.34	38.67	59.77	67.34
	51.66	31.33	48.23	52.66
CAT	77.1	39.45	56.87	82.16
	62.9	16.55	33.13	55.84
	73.35	42.34	52.69	79.61
	66.65	13.66	37.31	58.39
	79.34	31.67	50.77	76.34
	60.66	24.33	49.23	61.66
IL-6	57.1	101.45	76.87	64.16
	42.9	78.55	53.13	37.84
	53.35	104.34	72.69	61.61
	46.65	75.66	57.31	40.39
	59.34	93.67	70.77	58.34
	40.66	86.33	59.23	43.66
IL-1β	36.56	19.56	30.56	35.56
	33.44	16.44	27.44	32.44
	42.81	25.81	36.81	41.81
	27.19	10.19	21.19	26.19
	44.14	27.14	38.14	43.14
	25.86	8.86	29.86	24.86
TNF-alpha	102.1	174.45	137.87	97.16
	67.9	135.55	116.13	70.84
	88.35	169.34	134.69	97.61
	81.65	140.66	119.31	70.39
	94.34	159.67	146.77	93.34
	75.66	150.33	107.23	74.66
NF-KB	6.36	19.06	12.16	6.06
	5.24	12.54	9.04	4.94
	7.58	20.59	13.36	7.28
	4.02	11.01	7.84	3.72
	7.76	18.02	14.81	7.46
	3.84	13.58	6.39	3.54
NO	17.56	36.26	32.45	17.06
	16.44	29.74	21.55	15.94
	18.78	37.79	28.26	18.28
	15.22	28.21	25.74	14.72
	18.96	35.22	29.21	18.46
	15.04	30.78	24.79	14.54
BDNF	13.89	21.89	17.79	13.39
	11.11	19.11	15.01	10.61
	14.06	22.06	17.96	13.56
	10.94	18.94	14.84	10.44
	13.6	21.6	17.5	13.1
	11.4	19.4	19.3	10.9
Caspase3	2.6	5.46	4.47	2.49
	3.4	6.34	5.33	3.31
	2.63	5.51	4.53	2.53
	3.37	6.29	5.27	3.27
	3.47	6.37	5.37	3.37
	2.53	5.43	4.43	2.43
